# Supplementary material for: Acoustoelectronic nanotweezers enable dynamic and large-scale control of nanomaterials
Source: PubMed Central journal article supplement (PMC8219664; doi:10.1038/s41467-021-24101-z), 2021-06-22
Supplement: 41467_2021_24101_MOESM1_ESM.pdf [file 41467_2021_24101_MOESM1_ESM.pdf]

1  
2  
3  
4  
5  
6  
7  
8  
9  
10  
11  
12

Supplementary Information

**Acoustoelectronic nanotweezers enable dynamic and large-scale control of nanomaterials**

Peiran Zhang<sup>1,\*</sup>, Joseph Rufo<sup>1,\*</sup>, Chuyi Chen<sup>1</sup>, Jianping Xia<sup>1</sup>, Zhenhua Tian<sup>1</sup>, Liying Zhang<sup>1</sup>, Nanjing Hao<sup>1</sup>, Zhanwei Zhong<sup>2</sup>, Yuyang Gu<sup>1</sup>, Krishnendu Chakrabarty<sup>2</sup>, and Tony Jun Huang<sup>1</sup>✉

<sup>1</sup> Department of Mechanical Engineering and Materials Science, Duke University, NC 27708, USA

<sup>2</sup> Department of Electrical and Computer Engineering, Duke University, NC 27708, USA

\*These authors contribute equally to this paper.

✉ To whom correspondence should be addressed. Email: [tony.huang@duke.edu](mailto:tony.huang@duke.edu)

13 **Supplementary Figures**

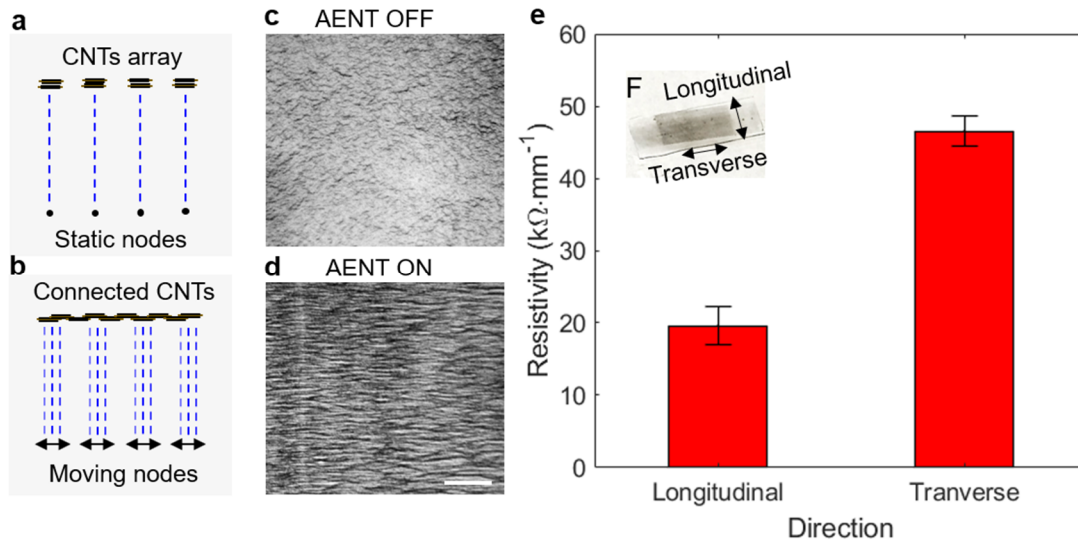

14  
 15 **Supplementary Figure 1.** Fabricating PDMS film with interconnected carbon nanotubes (CNTs)  
 16 and associated anisotropic resistivities. (a) Schematic configuration for patterning CNTs gratings  
 17 using static-nodes of AENT. (b) Schematic configuration for patterning interconnected CNTs  
 18 using moving-nodes of AENT. (c) Microscopic image of PDMS film containing CNTs transferred  
 19 from no wave region (*i.e.*, AENT OFF). (d) Microscopic image of PDMS film containing CNTs  
 20 transferred from standing wave region (*i.e.*, AENT ON). (e) Anisotropic resistivities of the surface  
 21 of PDMS film (*i.e.*, inset) containing interconnected CNTs. Scale bar: 60  $\mu m$ .

22

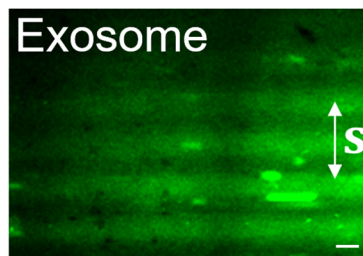

23  
 24 **Supplementary Figure 2.** 1D pattern of FITC-exosomes in isosmotic buffer using low amplitude  
 25 excitation. The label 's' with bi-arrows the propagation direction of the acoustoelectronic waves.  
 26 Scale bar: 30  $\mu m$ .

27

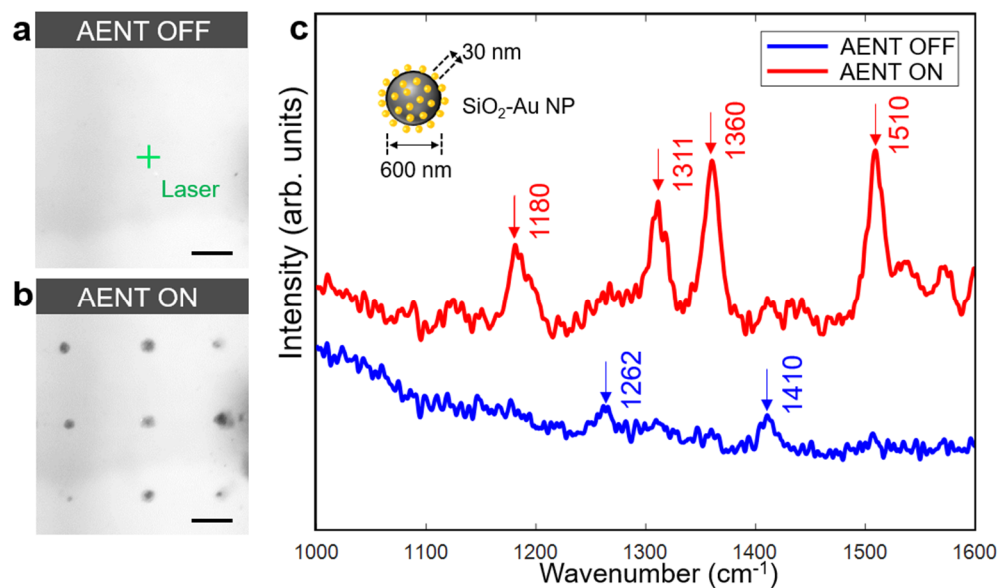

28  
 29 **Supplementary Figure 3.** Concentration of SERS probes. (a) The SERS probes are randomly  
 30 dispersed in the sample solution (*i.e.*,  $10^{-4}$  M Rhodamine 6G) when the AENT is off. The green  
 31 cross indicates the focal position of 633 nm laser. (b) 2D patterning of SERS probes when AENT  
 32 is on. (c) Raman spectra obtained at the laser focus when the AENT is OFF (*i.e.*, blue line) and  
 33 ON (*i.e.*, red line). The SERS probes are 600 nm diameter SiO<sub>2</sub> particles surface coated with 30  
 34 nm diameter gold SERS beads that can be patterned using low excitation amplitudes. The blue and  
 35 red arrows indicate the signature peaks of PDMS and Rhodamine 6G, respectively. Scale bars: 30  
 36  $\mu\text{m}$ .  
 37

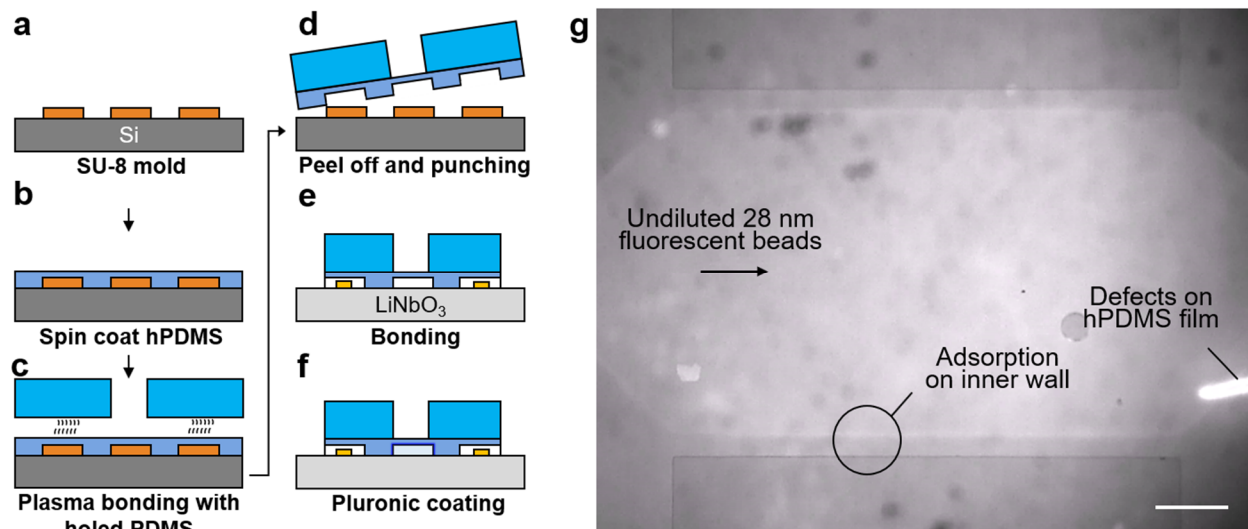

38  
 39 **Supplementary Figure 4.** Device fabrication. (a) – (f) Schematic pipeline for fabricating AENT  
 40 devices with thin ceilings and hPDMS walls. (g) The reduced surface adsorption and diffusion into  
 41 the wall coated with hPDMS (black circle) after 5 times of flushing of fluorescence 28 nm PS  
 42 beads at maximum concentration. The defects on the hPDMS walls (*i.e.*, cracks) serve as a control  
 43 that demonstrating the diffusion of small nano-beads into normal PDMS walls. Scale bar: 400 μm.

44

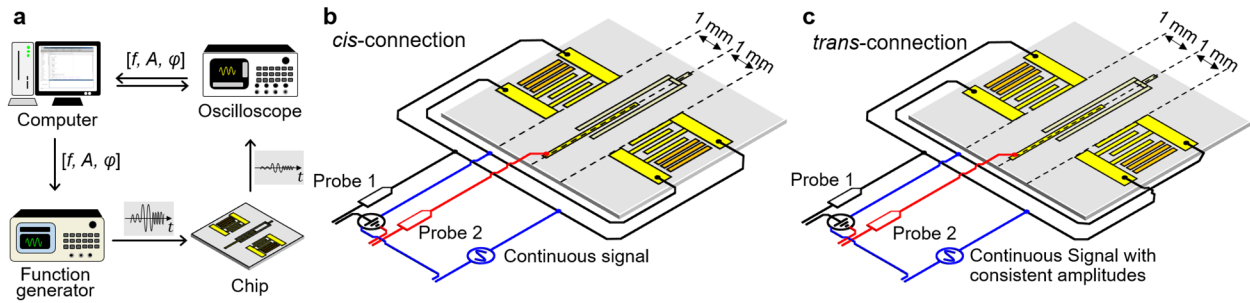

45  
 46 **Supplementary Figure 5.** Schematic setups for measuring the surface acoustoelectronic  
 47 efficiency ( $\kappa_{AET}$ ) for different piezoelectric substrates. **(a)** Measurement system setup. **(b)** Device  
 48 configuration for measuring the amplitude of the AC surface electric potential of DAs ( $\Phi_{cis}$ ) using  
 49 *cis*-electric connection of energizing the IDT pairs. **(c)** Device configuration for measuring the  
 50 amplitude of the AC surface electric potential of DNs ( $\Phi_{trans}$ ) using *trans*-electric connection of  
 51 energizing the IDT pairs. The measured excitation voltages are forcibly tuned to be consistent for  
 52 *cis* and *trans* scenarios. Image credit for **Supplementary Figure 5a**: Peiran Zhang.

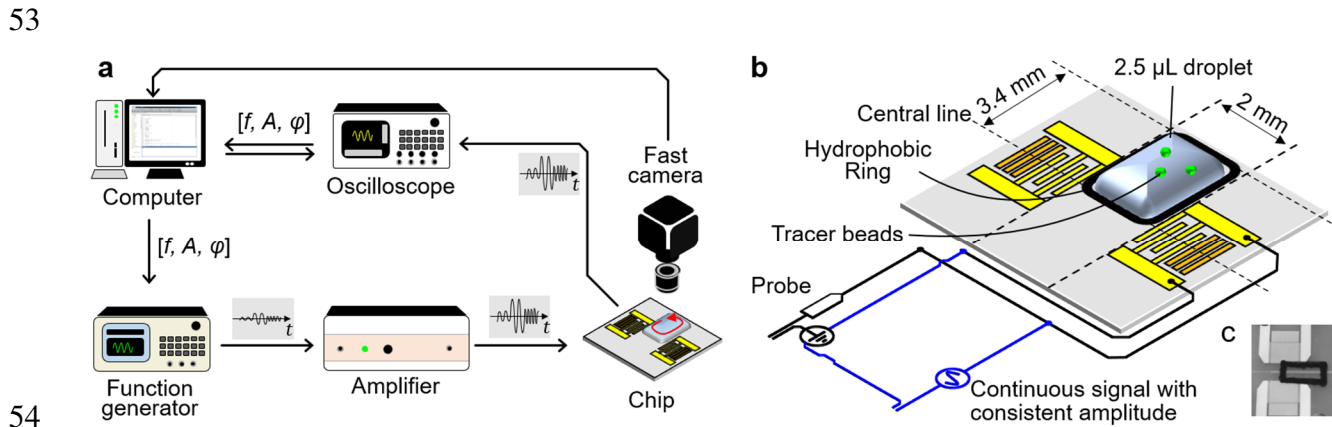

54  
 55 **Supplementary Figure 6.** Schematic setups for measuring the magnitude of time-averaged  
 56 acoustic streaming speed ( $u_{fluid}$ ). **(a)** Measurement system setup. **(b)** Device configuration for  
 57 measuring the streaming speed in a rotating droplet with fluorescence tracer particles. The  
 58 excitation voltages for measuring different piezoelectric materials are forcibly tuned to 5 Vpp. The  
 59 black contour indicates the position of hydrophobic ring that confines the boundary of the droplet.  
 60 **(c)** Device image with hydrophobic ring drawn by marker pen. Image credit for **Supplementary**  
 61 **Figure 6a**: Peiran Zhang.

62

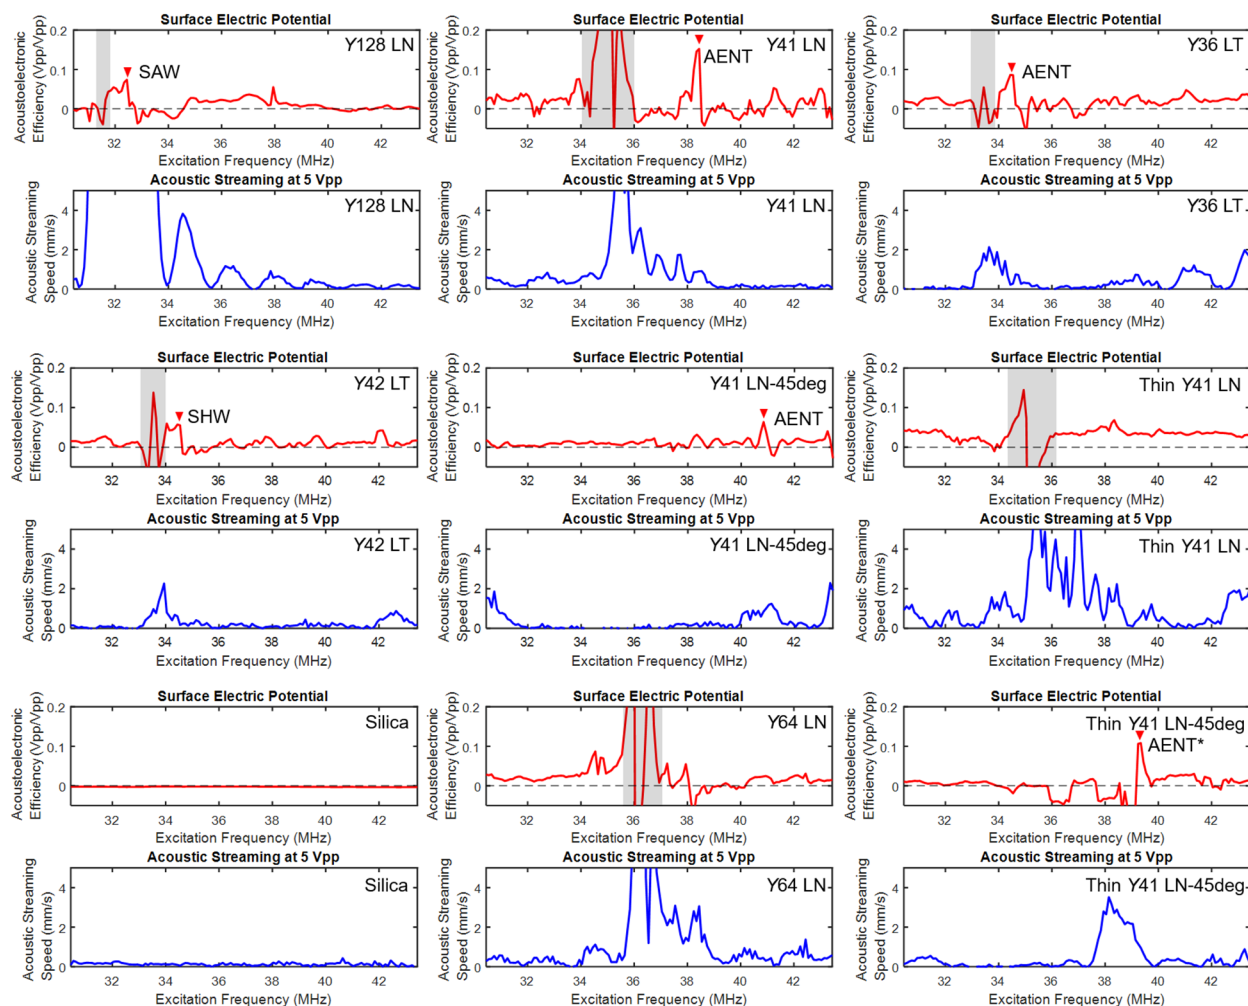

63  
 64 **Supplementary Figure 7.** Co-plotted data of frequency-dependent responses of surface  
 65 acoustoelectronic efficiency (red lines) and frequency-dependent acoustic streaming speed (blue  
 66 lines) for 9 piezoelectric substrates (**Supplementary Table 1**). The grey shadings indicate  
 67 abnormal and non-consistent response region, which are excluded for generating the chart of **Fig.**  
 68 **1d**. The ‘AENT’ labels indicate the frequency used for AENT substrates. ‘SHW’ indicates the  
 69 frequency used for generating shear-horizontal waves with previously published substrate Y-42  
 70 LiTaO<sub>3</sub>. ‘SAW’ indicates the frequency used for generating surface acoustic waves on Y-128  
 71 LiNbO<sub>3</sub>. The silica substrate does not have piezoelectricity and serves as a negative control.

72

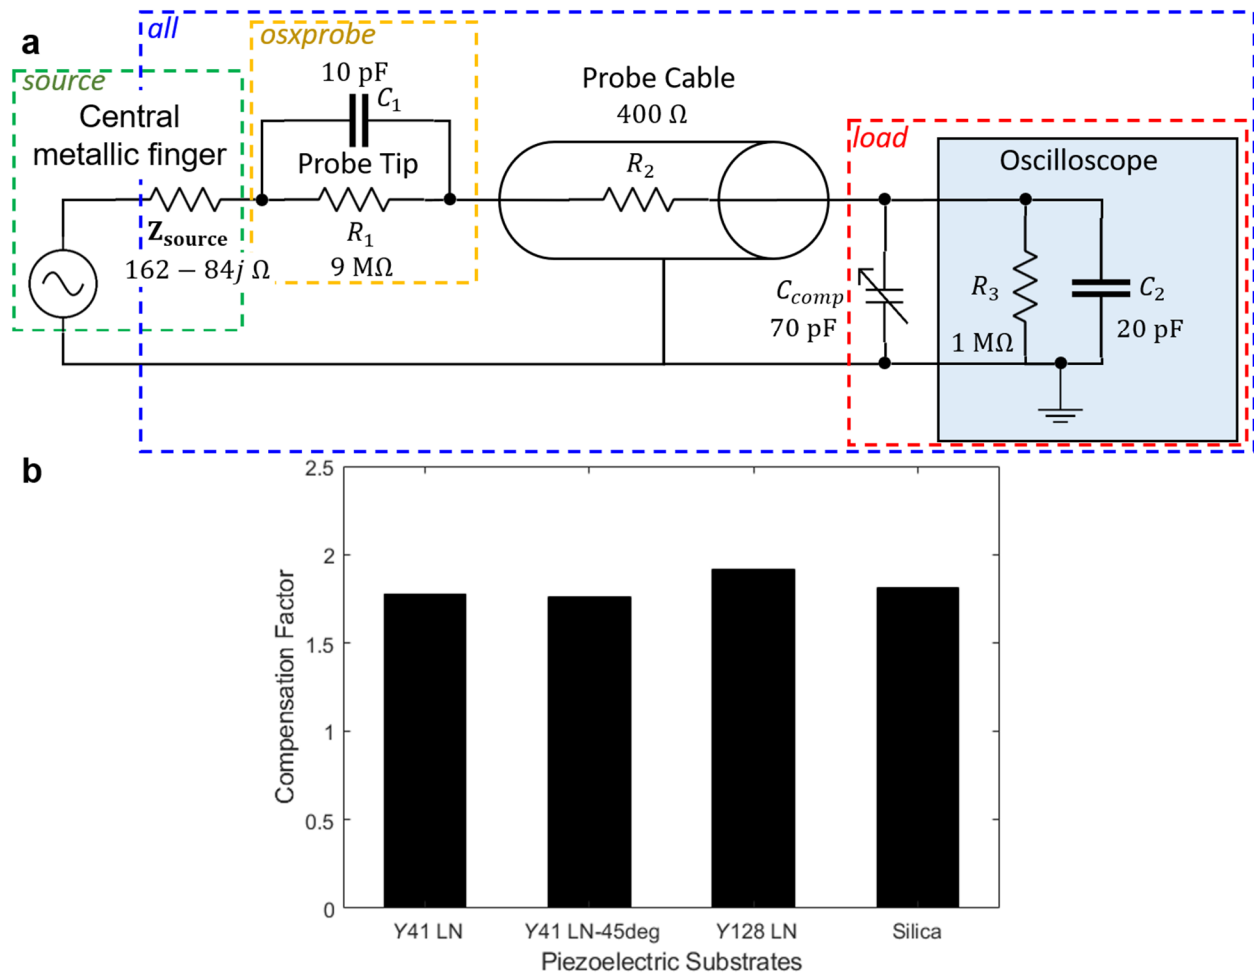

73  
74  
75  
76  
77  
78  
79  
80

**Supplementary Figure 8.** Electric modelling of the probe for measuring the electric surface potential on different crystals. (a) Schematic electric model for the measurement system. The labels 'load', 'osxprobe', 'source', 'all', and the corresponding dashed boxes indicate corresponding models of oscilloscope, oscilloscope probe, central metallic finger, and the whole system, respectively. (b) The compensation factors for deriving the actual surface electric potential on different piezoelectric crystals.

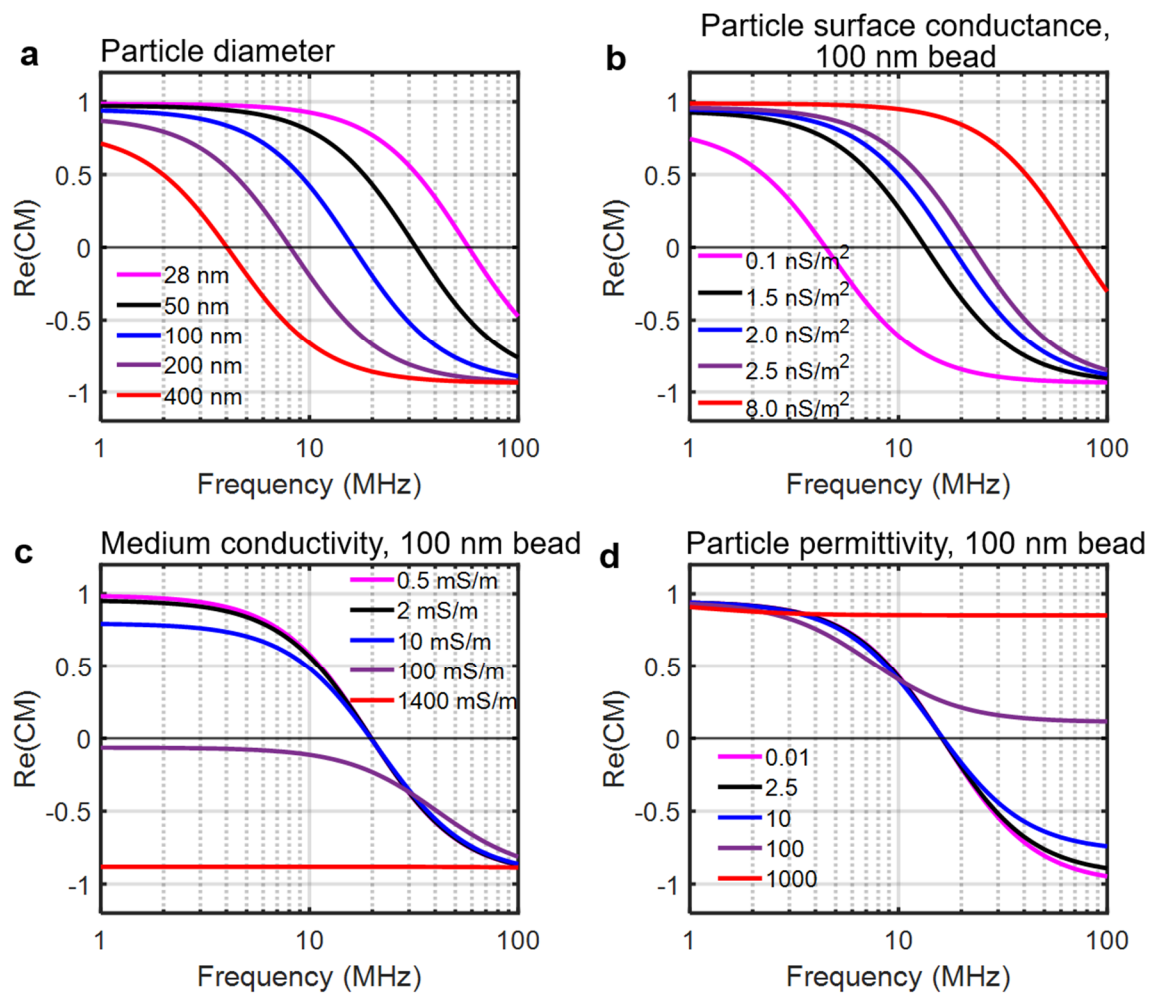

81  
 82 **Supplementary Figure 9.** Theoretical simulations of the frequency-dependent real-part of the CM  
 83 factors of nanobeads with varied particle diameter (a), surface conductance (b), medium  
 84 conductivity (c), and particle permittivity (d). For high-conductivity medium, the electric field will  
 85 be shield by the thin fluid-layer near the substrate and cannot actuate the nanoparticles.  
 86



87 **Supplementary Tables**88 **Supplementary Table 1. Piezoelectric material candidates for AENT.**

| Name                     | Piezoelectric material                                | Wave direction                | Notes                      |
|--------------------------|-------------------------------------------------------|-------------------------------|----------------------------|
| <b>Y128 LN</b>           | Y-128° LiNbO <sub>3</sub> , DSP <sup>†</sup> , 0.5 mm | X-axis of crystal             | Used for SAW <sup>§</sup>  |
| <b>Y41 LN</b>            | Y-41° LiNbO <sub>3</sub> , SSP <sup>‡</sup> , 0.5 mm  | X-axis of crystal             | Used in AENT <sup>  </sup> |
| <b>Y36 LT</b>            | Y-36° LiTaO <sub>3</sub> , SSP, 0.5 mm                | X-axis of crystal             | Used in AENT               |
| <b>Y42 LT</b>            | Y-42° LiTaO <sub>3</sub> , SSP, 0.5 mm                | X-axis of crystal             | Used for SHW <sup>#</sup>  |
| <b>Y41 LN-45deg</b>      | Y-41° LiNbO <sub>3</sub> , SSP, 0.5 mm                | 45°-rotated X-axis of crystal |                            |
| <b>Thin Y41 LN</b>       | Y-41° LiNbO <sub>3</sub> , SSP, 0.18 mm               | X-axis of crystal             |                            |
| <b>Silica</b>            | Silica wafer, DSP, 0.5 mm                             | N/A                           | Negative control           |
| <b>Y64 LN</b>            | Y-64° LiNbO <sub>3</sub> , SSP, 0.5 mm                | X-axis of crystal             | Can be used for AENT       |
| <b>Thin Y41 LN-45deg</b> | Y-41° LiNbO <sub>3</sub> , SSP, 0.18 mm               | 45°-rotated X-axis of crystal | Can be used for AENT       |

Notes: <sup>†</sup> DSP: double side polished. <sup>‡</sup> SSP: single side polished. <sup>§</sup> SAW: surface acoustic wave. <sup>||</sup> AENT: acoustoelectronic nanotweezers. <sup>#</sup> SHW: shear-horizontal wave.

89

90

91 **Supplementary Table 2. Parameters list for calculating CM factors of nanoparticles and**  
92 **vesicles.**

| Parameter           | Description                                                 | Value                                                |
|---------------------|-------------------------------------------------------------|------------------------------------------------------|
| $f$                 | Acoustic frequency                                          | 1 – 100 MHz                                          |
| $\omega$            | Angular frequency                                           | $2\pi f$                                             |
| $r$                 | Particle radius                                             | 50 nm                                                |
| $\sigma_m$          | Conductivity of medium                                      | $2 \times 10^{-3} \text{ S} \cdot \text{m}^{-1}$     |
| $\sigma_p$          | Conductivity of particle                                    | $10^{-14} \text{ S} \cdot \text{m}^{-1}$             |
| $\sigma_s$          | Surface conductivity of particle                            | $1.8 \times 10^{-9} \text{ S} \cdot \text{m}^{-2}$   |
| $\epsilon_m$        | Dielectric constant of medium                               | $80\epsilon_0$                                       |
| $\epsilon_p$        | Dielectric constant of particle                             | $2.55\epsilon_0$                                     |
| $\epsilon_0$        | Dielectric constant of vacuum                               | $8.85 \times 10^{-12} \text{ F} \cdot \text{m}^{-1}$ |
| $\sigma_{mem}$      | Conductivity of membrane of single-shell particle           | $2.5 \times 10^{-7} \text{ S} \cdot \text{m}^{-1}$   |
| $\sigma_{plasma}$   | Conductivity of inner space of single-shell particle        | $2 \times 10^{-1} \text{ S} \cdot \text{m}^{-1}$     |
| $\sigma_{mem_s}$    | Surface conductivity of membrane of single-shell particle   | $10 \times 10^{-9} \text{ S} \cdot \text{m}^{-2}$    |
| $\epsilon_{mem}$    | Dielectric constant of membrane of single-shell particle    | $3\epsilon_0$                                        |
| $\epsilon_{plasma}$ | Dielectric constant of inner space of single-shell particle | $75\epsilon_0$                                       |
| $R$                 | Inner radius of single-shell particle                       | $44 \times 10^{-9} \text{ m}$                        |
| $d$                 | Membrane thickness of single-shell particle                 | $6 \times 10^{-9} \text{ m}$                         |

93

94

95 **Supplementary Table 3. Acoustic parameters for the finite element simulation of AENT.**

| <b>Parameter</b> | <b>Description</b>                                                | <b>Value</b>                        |
|------------------|-------------------------------------------------------------------|-------------------------------------|
| $h$              | Channel height                                                    | 10, 25 $\mu\text{m}$                |
| $\lambda$        | Wavelength of acoustic waves                                      | 120 $\mu\text{m}$                   |
| $r$              | Particle radius                                                   | 50 nm                               |
| $c_p$            | Longitudinal wave speed of polystyrene nanoparticle               | 1950 $\text{m}\cdot\text{s}^{-1}$   |
| $\rho_p$         | Density of polystyrene nanoparticle                               | 1060 $\text{kg}\cdot\text{m}^{-3}$  |
| $c_m$            | Sound speed of water                                              | 1495 $\text{m}\cdot\text{s}^{-1}$   |
| $\rho_m$         | Density of water                                                  | 997 $\text{kg}\cdot\text{m}^{-3}$   |
| $c_s$            | Sound speed of used wave mode on Y41 LiNbO <sub>3</sub> substrate | 4612.8 $\text{m}\cdot\text{s}^{-1}$ |
| $\rho_s$         | Density of Y41 LiNbO <sub>3</sub>                                 | 4650 $\text{kg}\cdot\text{m}^{-3}$  |
| $c_{PDMS}$       | Longitudinal wave speed of PDMS                                   | 1080 $\text{m}\cdot\text{s}^{-1}$   |
| $\rho_{PDMS}$    | Density of PDMS                                                   | 970 $\text{kg}\cdot\text{m}^{-3}$   |
| $\mu$            | Dynamic viscosity of water (25 °C)                                | $1\times 10^{-3}$ Pa·s              |

96

97

98 **Supplementary Notes**

99 **Supplementary Note 1.** Synthesizing nanoparticles for SERS detection

100 **Synthesis of Au nanoparticles (Au NPs).** Au NPs with the size of ~30 nm were prepared  
101 according to previously reported method. [1] 2.5 mL of chloroauric acid (0.1 M) was added into  
102 100 mL of ultrapure water and then heated to boiling under magnetic stirring. After quickly  
103 injecting 1.5 mL of trisodium citrate (10 %, w/w), the mixed solution was refluxed for ~30 min  
104 until the color of solution became wine red. The resultant solution gradually cooled to room  
105 temperature under stirring and was stored in refrigerator at 4 °C for further use.

106 **Synthesis of SiO<sub>2</sub> nanoparticles (SiO<sub>2</sub> NPs).** Uniform spherical silica particles with the sizes of  
107 ~100 nm and ~600 nm were prepared by seeded growth based on the Stöber method. [2]

108 For the synthesis of ~100 nm SiO<sub>2</sub>, 300 µL of tetramethylethylenediamine and 3 mL of  
109 H<sub>2</sub>O were first mixed with 35 mL of ethanol under vigorous stirring. Then 2.25 mL of tetraethyl  
110 orthosilicate (TEOS) was added into above solution. After this addition, the whole mixture was  
111 allowed to react for 12 h, and the as-prepared SiO<sub>2</sub> dispersions were washed with ethanol by  
112 centrifugation (14,000 rpm, 10 min) three times. Finally, the SiO<sub>2</sub> nanoparticles powder was  
113 obtained after drying at 60 °C for 12 h.

114 For the synthesis of ~600 nm SiO<sub>2</sub>, a hydrolysis solution was first obtained by mixing 2  
115 mL of ammonium hydroxide, 20 mL of ethanol, and 10 mL of H<sub>2</sub>O. Then, 3 mL of the hydrolysis  
116 solution and 0.5 mL of TEOS were added into 50 mL three-necked flasks under an ice bath and  
117 rapidly stirred for 10 min to form the seed solution. During the growth process, 12 mL of  
118 hydrolysis solution and 12 mL of TEOS/ethanol solution (the ratio of TEOS to ethanol is 3:5 by  
119 volume) were simultaneously dropped into the seed solution through different necks at a rate of  
120 100 µL/min. After this addition, the whole mixture was allowed to react for 12 h, and the as-  
121 prepared SiO<sub>2</sub> dispersions were washed with ethanol by centrifugation (5,000 rpm, 15 min) three  
122 times. Finally, the SiO<sub>2</sub> nanoparticles powder was obtained after drying at 60 °C for 12 h.

123 **Synthesis of Au-coated silica nanoparticles (SiO<sub>2</sub>-Au NPs).** Au NPs were coated on the surface  
124 of SiO<sub>2</sub> by chemical modification. To obtain SiO<sub>2</sub>-Au NPs, amino-functionalized SiO<sub>2</sub> (SiO<sub>2</sub>-NH<sub>2</sub>)  
125 was first prepared through adding 200 µL of 3-aminopropyltriethoxysilane (APTS) to 10 ml of  
126 SiO<sub>2</sub>-ethanol solution (3 mg/mL). After reacting for 8 h, the mixture was centrifuged (14,000 rpm,  
127 5 min) and washed with ethanol three times before being dispersed into 4 mL of ultrapure water.

128 Then, 87  $\mu\text{L}$  of 3-mercaptopbenzoic acid, 20 mg of EDC and 2 mL of  $\text{SiO}_2\text{-NH}_2$  solution were  
129 added to 2 mL of ultrapure water, and the mixed solution was shaken for 8 h at room temperature.  
130 To remove excess Au NPs and EDC, the above solution was centrifuged (10,000 rpm, 5 min) and  
131 washed with ultrapure water three times. Finally, the  $\text{SiO}_2\text{-Au}$  NPs were re-dispersed into 1 mL of  
132 ultrapure water for further use.

133  
134 **Supplementary Note 2.** Calculation of the actuation forces on single 100 nm and 400 nm particles  
135 on acoustoelectronic nanotweezers

136 The force balances of a nanoparticle being manipulated by acoustoelectronic nanotweezers is  
137 governed by Supplementary Equation 1:

$$138 \quad m_p \mathbf{a} = \mathbf{F} - 6\pi\eta r \mathbf{v} \quad (1)$$

139  $m_p$ ,  $\mathbf{a}$ ,  $\eta$ ,  $r$ , and  $\mathbf{v}$  are the mass of the nanoparticle, the acceleration of particle, dynamic viscosity  
140 of medium, the radius of nanoparticles, and the moving speed of particle.  $\mathbf{F}$  is considered  
141 composite force acting on those single nanoparticles, and the influence from the acousto-  
142 dielectrophoresis will be dominating as the radius of particle becomes larger.  $\mathbf{a}$  and  $\mathbf{v}$  are derived  
143 from the PIV analysis of time-serial fluorescence images.

144  
145 **Supplementary Note 3.** Characterizing surface acoustoelectronic efficiency ( $\kappa_{\text{AET}}$ ) of  
146 piezoelectric materials

147 The goal of this section is to measure the ratio ( $\kappa_{\text{AET}}$ ) between the amplitude of received AC surface  
148 electric potentials ( $\Phi$ ) for different piezoelectric crystals with frequency dependency (*i.e.*, 30.44  
149 MHz – 43.44 MHz).

150 One challenge for measuring the surface acoustoelectronic efficiencies is the interference  
151 of radio frequency (RF) signals either in air or between the testing instruments, leading to irregular  
152 electric responses over nearly the full frequency spectrum for certain crystals (*e.g.*, Y-41  $\text{LiNbO}_3$ )  
153 and making the direct electric measurement of travelling pulse envelopes impossible. Thus, we  
154 opted to measure the surface electric potential ( $\Phi$ ) using a continuous standing wave configuration  
155 instead and acoustic streaming speed for different crystals, which is more suitable in the context  
156 of AENT. Specifically, the surface electric potential ( $\Phi$ ) is evaluated by calculating the differences  
157 between the measured amplitudes of continuous standing waves at the center-line of two opposing

158 IDTs with 0 and  $\pi$  phase-shifts (*e.g.*, nodes or antinodes for *trans* or *cis* connection), which greatly  
159 enhance the signal and eliminates received RF radiation background (**Supplementary Figure 5a**).

160 As shown in **Supplementary Figure 5b** and **5c**, we put a single-finger metallic probe (20  
161  $\mu\text{m}$  width) at the center-line of 2 opposing IDTs. These IDTs are separated by 2 mm and have  
162 carefully designed reflectors to enhance the resonance of acoustoelectronic waves. The concept  
163 underlying the method is to use the amplitude of received signal under *cis*- (**Supplementary**  
164 **Figure 5b**) connection of the IDT pairs to subtract that under *trans* (**Supplementary Figure 5c**)  
165 connection of the IDT pairs. The derived differences can be considered as the amplitude  
166 differences over DAs and DNs with 0 and  $\pi$  phase differences. Based on this concept, the  
167 backgrounds that obscure the AC surface potentials, including the radiation background from both  
168 the air and the substrate, and the noise originating from the irregular electric interactions or  
169 unknown sources, can be eliminated. Strictly speaking, we cannot claim that all background noise  
170 is completely removed, because the RF interactions between these instruments and the devices can  
171 be extremely complicated; however, this method can remove most of the noise effectively and has  
172 correctly reflected the potentials of different piezoelectric materials for the demonstration and  
173 validation of AENT in experiments. Note that our method cannot exactly resolve the modes of  
174 surface displacements (*i.e.*,  $x$ ,  $y$ , or  $z$ , **Fig. 1a**). This is because all the modes of displacements may  
175 generate transient electric charges coupled on the local deformation. However, the out-of-plane  
176 vibrations (*i.e.*,  $z$ -mode vibrations) can be resolved by the PIV experiments discussed in  
177 **Supplementary Note 4**. For resolving the in-plane vibrations (*i.e.*,  $x$ - and  $y$ -mode vibrations), the  
178 signs of the  $\kappa_{\text{AET}}$  implies which mode is dominating the vibration, since the  $y$ -mode vibrations  
179 (parallel to wave propagation) will lead to a phase-shift of  $\pi$  and negative signs for subtracting the  
180 measured amplitude under *trans*-scenario (**Supplementary Figure 5c**) from that under *cis*-  
181 scenario (**Supplementary Figure 5b**).

182 Take ‘Y41 LN’ for example, at the ‘AENT’ frequency, the chart shows a peak value of  
183 approximately  $+0.16 \text{ V}_{\text{pp}} \cdot \text{V}_{\text{pp}}^{-1}$ , indicating the  $x$ -mode vibrations (0 phase-shift, perpendicular to  
184 wave-propagation) are dominating the displacement at 38.44 MHz. Another piezoelectric material,  
185 Y-42 LiTaO<sub>3</sub>, known for generating shear-horizontal waves (‘SHW’, solid red diamond) also  
186 shows very low acoustic streaming speed at certain excitation frequencies, yet its  $\kappa_{\text{AET}}$  is  $\sim 60\%$   
187 lower than that of Y-36 LiTaO<sub>3</sub>. As a negative control of no piezoelectricity, a silica wafer is tested  
188 due to its centrosymmetrical crystallographic structure. The silica shows nearly zero surface

189 acoustoelectronic efficiency ( $\kappa_{\text{AET}}$ ) and acoustic streaming speed ( $u_{\text{fluid}}$ ). However, the zero  $\kappa_{\text{AET}}$   
190 at certain excitation frequencies does not necessarily mean that there is no displacement on the  
191 surface, since the  $\kappa_{\text{AET}}$  is not uniform around the rotational orientations of the displacement, or  
192 the mixed vibrations of  $x$ -mode and  $y$ -mode displacements may cancel the surface charges out due  
193 to the inherent phase difference of  $\pi$  in standing wave fields.

194 Notably, the excitation voltages for *cis*- and *trans*- connections can vary even if when the  
195 same values are set on the function generator (*i.e.*, 6 Vpp). To make the AC potentials consistent  
196 in both scenarios, the measured excitation voltages for the applied frequency component under the  
197 *cis*-scenarios are firstly recorded for a given voltage setup on the function generator, and then the  
198 measured excitation voltages at the applied frequency component under *trans*-scenarios are  
199 forcibly tuned to be as the same as the recorded *cis*-scenarios through real-time feed-back  
200 controlling codes. Furthermore, with the co-grounding electric connection configurations shown  
201 in **Supplementary Figure 5b** and **5c**, no significant variations of the measured AC surface  
202 potentials are observed when the shapes of the wires are changed. The data are shown by the red  
203 lines in **Supplementary Figure 7**. Silica substrate does not have piezoelectricity and serve as a  
204 negative control. We also co-screened the excitation amplitudes and excitation frequencies, and it  
205 seems that the excitation amplitudes do not have significant effect on  $\kappa_{\text{AET}}$  when  $< 20$  Vpp.

206  
207 **Supplementary Note 4.** Measuring acoustic streaming speed ( $u_{\text{fluid}}$ ) on different piezoelectric  
208 materials

209 To enable nano-manipulation with AENT, the out-of-plane vibrations and associated acoustics-  
210 induced hydrodynamic disturbances need to be minimized. To measure the acoustic energy leaked  
211 into fluid for different piezoelectric substrates, we performed measurements on the averaged  
212 acoustic streaming speed within a 2.5  $\mu\text{L}$  water droplet using consistent measured excitation  
213 voltages for different frequencies and crystals. As shown in **Supplementary Figure 6**, the water  
214 droplet is placed in the hydrophobic ring tangential to the dashed ‘central line’. Once the IDT is  
215 activated, the 10  $\mu\text{m}$  fluorescence PS beads will be rotated with flow and the trajectories will be  
216 recorded. The excitation frequency will be automatically shifted throughout the range of interest  
217 (*i.e.*, 30.44 – 43.44 MHz) while recording the fluorescence videos using a fast camera. The  
218 measured excitation voltages are forcibly tuned to 5 Vpp *via* real-time feedback control. The

219 acquired videos are processed by homemade PIV codes, and the time-averaged particle speeds are  
220 plotted with respect to the excitation frequencies.

221 The previous attempts on acoustic pressure measurement using hydrophone have failed  
222 due to electric interferences. Although the magnitude of acoustic streaming does not linearly  
223 correlated to the amplitude of out-of-plane vibrations as acoustic pressure does, the streaming speed  
224 reflects the relative potentials of different piezoelectric materials for generating acousto-  
225 hydrodynamic disturbances.

226

227 **Supplementary Note 5.** Electronic modelling of the setup for surface electric potential  
228 measurement

229 The measured acoustoelectronic efficiencies for different piezoelectric crystals in **Fig. 1d** and  
230 **Supplementary Figure 7** have not been compensated from the perspective of high-frequency  
231 electronics for the measurement setup. In this note, we provide an electrical model on measurement  
232 compensation and deriving the actual surface electric potential amplitudes in a standing  
233 acoustoelectronic wave field.

234 The electrical model of the measurement setup is shown in **Supplementary Figure 8a**. For  
235 the electrical measurement scenarios discussed in **Supplementary Note 3**, the central metallic  
236 probe within the standing wave region can be considered as a power source of sinusoidal voltages.  
237 The induced voltages first go through the central metal probe with an impedance  $Z_{\text{source}}$  of  $162 -$   
238  $84j \Omega$  for Y41 LiNbO<sub>3</sub>. Note that this impedance is measured at the frequency of 38.44 MHz using  
239 the impedance measurement instrument (Keysight E5063A). Next, this voltage signal is picked up  
240 by a 10:1 oscilloscope passive probe (Keysight N2842A), which can be modeled as the parallel  
241 connection of a 10 pF capacitor ( $C_1$ ) and a 9 MΩ resistor ( $R_1$ ). The voltage signals go through a  
242 lossy coaxial cable with a resistance of 400 Ω ( $R_2$ ) and finally are picked up by the oscilloscope.  
243 The internal load of the oscilloscope can be modeled as the parallel connection of a 20 pF  
244 capacitor ( $C_2$ ) and a 1 MΩ resistor ( $R_3$ ). Between the probe cable and the oscilloscope, a tunable  
245 capacitor ( $C_{\text{comp}}$ ) is used to calibrate waveform deformation, and the capacitance should satisfy:  
246  $\frac{R_1}{R_3} = \frac{C_2 + C_{\text{comp}}}{C_1}$ . Therefore, it can be calculated that  $C_{\text{comp}} = 70 \text{ pF}$  was used in the measurement  
247 setup.

248 Assuming the overall impedance is  $Z_{all}$  and the impedance of the oscilloscope is  $Z_{load}$ , the  
 249 voltage measured by the oscilloscope can be expressed using the follow equations (Supplementary  
 250 Equation 2 - 9):

$$251 \quad |Z_{load}| = \frac{1}{\sqrt{\left(\frac{1}{R_3}\right)^2 + (2\pi f(C_2 + C_{comp}))^2}} \quad (2)$$

$$252 \quad \phi_{load} = \tan^{-1}(-2\pi f(C_2 + C_{comp})R_3) \quad (3)$$

$$253 \quad Z_{load} = |Z_{load}| \cos\phi_{load} + |Z_{load}| \sin\phi_{load} \cdot j \quad (4)$$

$$254 \quad |Z_{osxprobe}| = \frac{1}{\sqrt{\left(\frac{1}{R_1}\right)^2 + (2\pi f C_1)^2}} \quad (5)$$

$$255 \quad \phi_{osxprobe} = \tan^{-1}(-2\pi f C_1 R_1) \quad (6)$$

$$256 \quad Z_{osxprobe} = |Z_{osxprobe}| \cos\phi_{osxprobe} + |Z_{osxprobe}| \sin\phi_{osxprobe} \cdot j \quad (7)$$

$$257 \quad Z_{all} = Z_{source} + Z_{osxprobe} + R_2 + Z_{load} \quad (8)$$

$$258 \quad V_{load} = \frac{V_{source}}{|Z_{all}|} |Z_{load}| \cdot 10 = 0.59 \cdot V_{source} \quad (9)$$

259 where the symbols with labels ‘load’, ‘osxprobe’, ‘source’, and ‘all’ indicate the parameters (*i.e.*,  
 260 impedance  $Z$ , phase  $\phi$ ) associated with oscilloscope, oscilloscope probe, central metallic finger,  
 261 and the whole system, respectively (**Supplementary Figure 8a**). Based on the above calculation,  
 262 the voltage shown in the oscilloscope is only 59% of that actually applied on the wire. Note that  
 263 different substrates have different electric characteristics at 38.44 MHz, therefore the actual  
 264 calibration factors vary depending on the materials and rotation angles of the IDT (**Supplementary**  
 265 **Figure 8b**). The calculated surface potentials need to be further compensated by multiplying by  
 266 1.047 to obtain the correct peak-peak potential of the tested standing wave field, due to the  
 267 geometric averaging effect of a 20  $\mu\text{m}$  width metal probe aligned with the antinodes of the  
 268 acoustoelectronic waves with a sinusoidal periodicity of 60  $\mu\text{m}$ . Thus, the compensation factor for  
 269 the actual surface electric potential on Y41 LiNbO<sub>3</sub> is  $1.047 \times 1/0.59 = 1.78$ .

270

271 **Supplementary Note 6.** Prediction of nanoparticle behaviors in alternating current electric fields  
 272 created by acoustoelectronic nanotweezers

273 The time-average force acting on the nanoparticle is given by Supplementary Equation 10:



$$\langle F_{AE} \rangle = 2\pi r^3 \varepsilon_m \text{Re}(\mathbf{CM}) \nabla |\vec{\mathbf{E}}_{\text{rms}}|^2 \quad (10)$$

275  $r$ ,  $\varepsilon_m$ ,  $\mathbf{CM}$ , and  $\vec{\mathbf{E}}_{\text{rms}}$  are the radius of nanoparticle, the dielectric constant of medium, the  
276 Clausius-Mossotti (CM) factor of nanoparticle, and the RMS value of electric field strength.

277 The CM factor of solid, homogeneous nanoparticles in the alternating current electric field can be  
278 predicted by the calculation below (Supplementary Equation 11 – 14):

$$\mathbf{CM}_\sigma = \frac{\sigma_c - \sigma_m}{\sigma_c + \sigma_m} \quad (11)$$

$$\sigma_m = \sigma_m - i\omega\varepsilon_m; \sigma_c = \sigma_c - i\omega\varepsilon_p; \sigma_c = \sigma_p + \frac{2\sigma_s}{r} \quad (12)$$

$$\mathbf{CM}_\varepsilon = \frac{\varepsilon_p - \varepsilon_m}{\varepsilon_p + \varepsilon_m} \quad (13)$$

$$\varepsilon_m = \varepsilon_m + i\frac{\sigma_m}{\omega}; \varepsilon_p = \varepsilon_p + i\frac{\sigma_c}{\omega} \quad (14)$$

283  $\mathbf{CM}_\sigma$  and  $\mathbf{CM}_\varepsilon$  are the CM factor calculated from the conductivity and permittivity, respectively.  
284  $\sigma_m$ ,  $\sigma_p$ ,  $\varepsilon_m$ ,  $\varepsilon_p$ ,  $\omega$ , and  $r$  are the conductivities of the medium and the particle, the dielectric  
285 constants of the medium and the particle, the angular frequency of the acoustic waves, the radius  
286 of the particle, respectively.  $\sigma_c$  and  $\sigma_s$  are the composite conductivity and surface conductivity of  
287 the particle. The values of related parameters are shown in Supplementary Table 2.

288 The CM factor of spherical, vesicle-like nanoparticles in the alternating current electric field can  
289 be predicted by the single-shell model below (Supplementary Equation 15 - 19):

$$\mathbf{CM}_v = \frac{\varepsilon_v - \varepsilon_m}{\varepsilon_v + 2\varepsilon_m} \quad (15)$$

$$\varepsilon_m = \varepsilon_m + i\frac{\sigma_m}{\omega}; \varepsilon_v = \frac{(\gamma^3 + 2\mathbf{K}_{23})}{\gamma^3 - \mathbf{K}_{23}} \quad (16)$$

$$\mathbf{K}_{23} = \frac{\varepsilon_{\text{plasma}} - \varepsilon_{\text{mem}}}{\varepsilon_{\text{plasma}} + 2\varepsilon_{\text{mem}}}; \gamma = \frac{R + d}{R} \quad (17)$$

$$\varepsilon_{\text{mem}} = \varepsilon_{\text{mem}} + i\frac{\sigma_{\text{mem}_c}}{\omega}; \varepsilon_{\text{plasma}} = \varepsilon_{\text{plasma}} + i\frac{\sigma_{\text{plasma}}}{\omega} \quad (18)$$

$$\sigma_{\text{mem}_c} = \sigma_{\text{mem}} + \frac{2\sigma_{\text{mem}_s}}{r} \quad (19)$$

295  $\mathbf{CM}_v$  is the CM factor of single shell particle.  $\sigma_m$ ,  $\sigma_{\text{mem}}$ ,  $\sigma_{\text{plasma}}$ ,  $\varepsilon_m$ ,  $\varepsilon_{\text{mem}}$ ,  $\varepsilon_{\text{plasma}}$ ,  $\omega$ , and  $r$  are  
296 the conductivities of the medium, the vesicle membrane, and the vesicle plasma, the dielectric  
297 constants of the medium, the vesicle membrane, and the vesicle plasma, the angular frequency of  
298 the acoustic waves, the radius of the particle, respectively.  $\sigma_{\text{mem}_c}$  and  $\sigma_{\text{mem}_s}$  are the composite

299 conductivity and surface conductivity of the vesicle membrane.  $R$  and  $d$  are the inner radius of the  
 300 vesicle and the thickness of the membrane, respectively. The values of related parameters are  
 301 shown in Supplementary Table 2. The  $\mathbf{CM}_v$  and the behavior of vesicle-like nanoparticle are  
 302 sensitive to surface conductivity, which is sensitive to the zeta-potential and the conductance of  
 303 membrane.

304

### 305 **Supplementary Note 7.** Numerical simulation of AENT

306 In this work, the mechanical vibration and the electric potential in the substrate, as well as the  
 307 electric potential and acoustic field in the liquid were numerically simulated for analyzing the  
 308 acoustoelectronic force (AEF) and acoustic radiation force (ARF) in AENT. The mechanical  
 309 vibration and the electrical response in the  $41^\circ$  Y-X LiNbO<sub>3</sub> substrate are governed by the  
 310 following equations (Supplementary Equation 20 - 21):

$$311 \quad T_{ij} = C_{ijkl}^E \cdot S_{kl} - e_{ijk}^T \cdot E_k \quad (20)$$

$$312 \quad D_i = e_{ikl} \cdot S_{kl} + \epsilon_{ij}^S \cdot E_k \quad (21)$$

313 where the stress vector ( $T_{ij}$ ), the strain vector ( $S_{kl}$ ), the electrical displacement ( $D_i$ ), and the electric  
 314 field ( $E_k$ ) are coupled; and the  $C_{ijkl}^E$ ,  $e_{ijk}$ , and  $\epsilon_{ij}$  stand for the elasticity matrix, the piezoelectric  
 315 matrix, and the permittivity matrix, respectively. In the liquid, electrostatic field is governed by  
 316 the following equations (Supplementary Equation 22 - 23):

$$317 \quad \mathbf{E} = -\nabla V \quad (22)$$

$$318 \quad \nabla \cdot (\epsilon_0 \epsilon_r \mathbf{E}) = \rho_v \quad (23)$$

319 where  $\mathbf{E}$  is the electric field,  $V$  is the electric potential,  $\epsilon_0$  is the permittivity of the vacuum,  $\epsilon_r$  is  
 320 the relative permittivity of the liquid, and  $\rho_v$  is a space charge density. The harmonic acoustic field  
 321 is governed by the mass and momentum conservation equations (Supplementary Equation 24 - 25):

$$322 \quad j\omega\rho + \rho_0 \nabla \cdot (\mathbf{v}) = 0 \quad (24)$$

$$323 \quad \rho_0 j\omega \mathbf{v} = -c_0^2 \nabla \rho + \mu \nabla^2 \mathbf{v} + \left( \frac{1}{3} \mu + \mu_B \right) \nabla (\nabla \cdot \mathbf{v}) \quad (25)$$

324 where  $\rho$  is the density perturbation,  $\mathbf{v}$  is the medium vibration velocity, and  $\omega$  is the angular  
 325 frequency of the acoustic field;  $\rho_0$ ,  $c_0$ ,  $\mu$ , and  $\mu_B$  are the stasis density, speed of sound, dynamic  
 326 viscosity, and bulk viscosity of the medium, respectively; and  $j$  is the imaginary unit ( $j^2 = -1$ ).

327 The constitutive relation between acoustic pressure ( $p$ ) and density perturbation ( $\rho$ ) can be written  
 328 as the follow equation (Supplementary Equation 26):

$$329 \quad p = c_0^2 \rho \quad (26)$$

330 Based on these governing equations, COMSOL Multiphysics Version 5.4 (the COMSOL group)  
 331 was used to simulate the physics coupled between the substrate and the loading liquid. The  
 332 predefined “Solid Mechanic” interface was applied to the substrate for the solution of the  
 333 mechanical vibration. The “Electrostatics” interface was applied to both of the substrate and the  
 334 liquid fields to solve the electrical behavior in these fields. And the “Thermoviscous Acoustic”  
 335 was applied to solve the acoustic field in the liquid. The “Piezoelectric Effect” Multiphysics  
 336 condition was applied to the boundary between the two fields to the substrate field to couple the  
 337 mechanical vibration and the electrical behavior in the substrate. And, the “Thermoviscous  
 338 Acoustic-Structure Boundary”, which constrains the velocity continuity, was applied to the  
 339 boundary between the substrate and liquid. The positive and negative electric potential was applied  
 340 to the IDT fingers alternatively as the activation of the device. Additionally, the mentioned  
 341 interfaces were solved together either in frequency domain at the resonance frequency for the time-  
 342 averaged solution of the substrate displacement, electrical field, and acoustic field or using a time  
 343 dependent solver for the dynamic behavior of these fields.

344 Based on the solution of acoustic pressure ( $p$ ) and medium vibration velocity ( $\mathbf{v}$ ) time-averaged  
 345 acoustic radiation force work on the nano particles can be calculated by the classic Gorkov’s model  
 346 (Supplementary Equation 27 - 29):

$$347 \quad F_{rad} = -\nabla \left\{ V_p \left[ \frac{f_1}{2\rho_0 c_0^2} \langle p^2 \rangle - \frac{3\rho_0 f_2}{4} \langle \mathbf{v} \cdot \mathbf{v} \rangle \right] \right\} \quad (27)$$

$$348 \quad f_1 = 1 - \frac{\rho_0 c_0^2}{\rho_p c_p^2} \quad (28)$$

$$349 \quad f_2 = \frac{2(\rho_p - \rho_0)}{2\rho_p + \rho_0} \quad (29)$$

350 where  $V_p$  is the volume of the particle, and  $\rho_p$  and  $c_p$  are its density and speed of sound velocity.  
 351 Using Gorkov’s model, the calculated acoustic radiation forces are ~20 times smaller than the  
 352 AEF for a 100 nm particle. However, for nano-scale manipulation, the thermoviscous boundary  
 353 effects will significantly enhance the acoustic contrast factors of nanoparticles, increasing the  
 354 acoustic radiation forces to the same magnitude of AEF in the updated model (*i.e.*, the “small-

355 width boundary layers” regime, *Phys. Rev. E*, 92, 043010, 2015), but the former is still no larger  
 356 than AEF. Despite the discrepancies between the two models, the dominance of acoustoelectronic  
 357 effects is validated by patterning 100 nm particles over half-shielded substrates as shown in Fig.  
 358 2a.

359 For simulating the 2D AENT with orthogonal wave interferences, the displacement of SH waves  
 360 in both directions can be written as the follow equations (Supplementary Equation 30 - 31):

$$361 \quad \mathbf{u}_1 = U_1[e^{i(\omega_1 t - k_{1x}x - k_{1y}y)} + e^{i(\omega_1 t + k_{1x}x + k_{1y}y + \varphi_1)}] \quad (30)$$

$$362 \quad \mathbf{u}_2 = U_2[e^{i(\omega_2 t - k_{2x}x + k_{2y}y)} + e^{i(\omega_2 t + k_{2x}x - k_{2y}y + \varphi_2)}] \quad (31)$$

363 Here,  $U_1$  and  $U_2$  are the displacement amplitude of both directions;  $\varphi_1$  and  $\varphi_2$  are the phase  
 364 difference of the two IDTs in both directions, respectively. When the frequencies  $f_1$  and  $f_2$  of both  
 365 directions are the same, the angular frequency  $\omega_1 = \omega_2 = 2\pi f_1$ , and the components of wave number  
 366  $k_{1x} = k_{1y} = k_{2x} = k_{2y} = \sqrt{2}/(2\lambda)$ , where  $\lambda$  is the wavelength of acoustic waves. The voltage  
 367 distribution and DEP force is calculated by coupling the Electrostatics and Solid Mechanics  
 368 modules in COMSOL Multiphysics®. When the frequencies  $f_1$  and  $f_2$  are different, the voltage  
 369 distributions  $V_1$  and  $V_2$  for both directions are first calculated, respectively. Then the total voltage  
 370 distribution  $V$  changing with time  $t$  is calculated by  $V = |V_1|\sin(\omega_1 t) + |V_2|\sin(\omega_2 t)$  using  
 371 Algebraic Equation module in COMSOL Multiphysics®. The time averaging operator is calculated  
 372 in the range of  $[0, 1/|f_2 - f_1|]$ .

373

374 **Supplementary References**

375 [1]. Zhang, L., Jin, Y., Mao, H., Zheng, L., Zhao, J., Peng, Y., Du, S., and Zhang, Z., Structure-  
376 selective hot-spot Raman enhancement for direct identification and detection of trace penicilloic  
377 acid allergen in penicillin. *Biosens. Bioelectron.* **2014**, *58*, 165-171.

378 [2]. Stöber, W., Fink, A., and Bohn, E., Controlled Growth of Monodisperse Silica Spheres in  
379 the Micron Size Range. *J. Colloid Interface Sci.* **1968**, *26*, 62-69.

380
