# Supplementary material for: Acoustoelectronic nanotweezers enable dynamic and large-scale control of nanomaterials
Source: PubMed Central journal article supplement (PMC8219664; doi:10.1038/s41467-021-24101-z), 2021-06-22
Supplement: 41467_2021_24101_MOESM2_ESM.pdf [file 41467_2021_24101_MOESM2_ESM.pdf]

## Description of Additional Supplementary Files

**Supplementary Movie 1.** Patterning of 100 nm PS nanobeads on half-shield substrate ( $\lambda = 80 \mu\text{m}$ , (1/2)) and 110 nm PS beads ( $\lambda = 120 \mu\text{m}$ , (2/2)) with streaming using 1D AENT. Scale bars:  $60 \mu\text{m}$ .

**Supplementary Movie 2.** Patterning of 50 nm (1/2) and 28 nm (2/2) PS nanobeads using 1D AENT. Scale bars:  $240 \mu\text{m}$ .

**Supplementary Movie 3.** Abnormal patterns of fluorescent exosomes in isosmotic buffer (1/2) and 100 nm PS nanobeads in water (2/2) under high-amplitude excitation signals. Scale bars:  $60 \mu\text{m}$ .

**Supplementary Movie 4.** Transient displacement distribution of pulsed travelling acoustoelectronic waves forming time-of-flight (ToF) AENT.

**Supplementary Movie 5.** Harmonic merging and splitting of 100 nm PS beads using two frequency components ( $\lambda_1 = 120 \mu\text{m}$ ,  $\lambda_2 = 300 \mu\text{m}$ ). Scale bar:  $60 \mu\text{m}$ .

**Supplementary Movie 6.** Dynamic manipulation of CNTs. Continuously growing CNT pattern in flow with 1D AENT (1/3). Pattern transformation of CNTs using 2D AENT (2/3). Scale bars:  $60 \mu\text{m}$ . On-demand orientation control of CNTs with 2D AENT (3/3). Scale bar:  $15 \mu\text{m}$ .

**Supplementary Movie 7.** Single nano-particle manipulation. (1/2) Patterning 400 nm PS beads and (2/2) repeated pairing and release of single 400 nm particles using 2D AENT. Scale bars:  $50 \mu\text{m}$ .
